# Supplementary material for: Development of a prediction model for 30-day acute readmissions among older medical patients: the influence of social factors along with other patient-specific and organisational factors
Source: PubMed Central journal article supplement — BMJ Open Qual. 2019 Jun 9;8(2):e000544. doi: 10.1136/bmjoq-2018-000544 (PMC6567955; doi:10.1136/bmjoq-2018-000544), 2019-06-09
Supplement: bmjoq-2018-000544supp004.pdf [file bmjoq-2018-000544supp004.pdf]

# Supplementary data

Online table 1

| Patient outcomes/readmission 30 days after discharge with respect to demographic, social and organisational factors |                                        |                        |                    |                      |
|---------------------------------------------------------------------------------------------------------------------|----------------------------------------|------------------------|--------------------|----------------------|
|                                                                                                                     |                                        | Not readmitted (n=619) | Readmitted (n=151) | Total (n=770)        |
| Demographic factors                                                                                                 |                                        | (row percentages)      |                    | (column percentages) |
| Age                                                                                                                 | 65-77 years                            | 309 (82)               | 68 (18)            | 377 (49)             |
|                                                                                                                     | 78-98 years                            | 310 (79)               | 83 (21)            | 393 (51)             |
| Gender                                                                                                              | Female                                 | 307 (83)               | 61 (17)            | 368 (48)             |
|                                                                                                                     | Male                                   | 312 (78)               | 90 (22)            | 402 (52)             |
| Residence by city size                                                                                              | Lived in cities with ≤4999 inhabitants | 352 (82)               | 78 (18)            | 430 (56)             |
|                                                                                                                     | Lived in cities with ≥5000 inhabitants | 267 (79)               | 73 (22)            | 340 (44)             |
| Social factors                                                                                                      |                                        |                        |                    |                      |
| Education                                                                                                           | Basic school                           | 299 (78)               | 85 (22)            | 384 (50)             |
|                                                                                                                     | Vocational education                   | 196 (83)               | 39 (16)            | 235 (31)             |
|                                                                                                                     | Higher education                       | 87 (86)                | 14 (14)            | 101 (13)             |
|                                                                                                                     | Missing                                | 37 (74)                | 13 (26)            | 50 (7)               |
| Income                                                                                                              | First quartile (lowest income)         | 144 (75)               | 48 (25)            | 192 (25)             |
|                                                                                                                     | Second quartile                        | 158 (82)               | 35 (18)            | 193 (25)             |
|                                                                                                                     | Third quartile                         | 154 (80)               | 39 (20)            | 193 (25)             |
|                                                                                                                     | Fourth quartile (highest income)       | 163 (85)               | 29 (15)            | 192 (25)             |
| Children living close by                                                                                            | No                                     | 385 (80)               | 94 (20)            | 479 (62)             |
|                                                                                                                     | Yes                                    | 234 (80)               | 57 (20)            | 291 (38)             |
| Spouse with or without comorbidity (based on Charlson Comorbidity Index/CCI)                                        | Spouse with CCI of 0-1                 | 214 (79)               | 56 (21)            | 270 (35)             |
|                                                                                                                     | Spouse with CCI of 2+                  | 66 (86)                | 11 (14)            | 77 (10)              |
|                                                                                                                     | No spouse                              | 339 (80)               | 84 (20)            | 423 (55)             |
| Organisational factors                                                                                              |                                        |                        |                    |                      |
| Municipality of residence                                                                                           | Holbæk                                 | 250 (80)               | 61 (20)            | 311 (40)             |
|                                                                                                                     | Kalundborg                             | 179 (82)               | 39 (18)            | 218 (28)             |
|                                                                                                                     | Odsherred                              | 190 (79)               | 51 (21)            | 241 (31)             |
| Distance to GP                                                                                                      | 64-2613 (median) meters                | 277 (79)               | 72 (21)            | 349 (45)             |
|                                                                                                                     | More than 2613 meters                  | 272 (82)               | 60 (18)            | 332 (43)             |
|                                                                                                                     | Missing                                | 70 (79)                | 19 (21)            | 89 (12)              |
| Contact with GP within one month before index admission                                                             | 1-4 contacts                           | 363 (81)               | 84 (19)            | 447 (58)             |
|                                                                                                                     | 5+ contacts                            | 256 (79)               | 67 (21)            | 323 (42)             |
| Contact with emergency doctor within one month before index admission                                               | No                                     | 363 (83)               | 74 (17)            | 437 (57)             |
|                                                                                                                     | Yes                                    | 256 (77)               | 77 (23)            | 333 (43)             |
| Need of <i>personal assistance</i> before admission                                                                 | No                                     | 449 (81)               | 108 (19)           | 557 (72)             |
|                                                                                                                     | Yes                                    | 170 (80)               | 43 (20)            | 213 (28)             |
| Need of <i>practical assistance</i> before admission                                                                | No                                     | 473 (80)               | 116 (20)           | 589 (77)             |
|                                                                                                                     | Yes                                    | 146 (81)               | 35 (19)            | 181 (24)             |

NOTE: The following covariates are not presented because of insufficient number of observations (<10 readmissions within 30 days): (1) Clinical assessment of strained social network and (2) clinical assessment of higher need for homecare after discharge.

Online table 2

| Patient outcome/readmission 30 days after discharge with respect to health-related factors |                     |                                     |                     |                                   |
|--------------------------------------------------------------------------------------------|---------------------|-------------------------------------|---------------------|-----------------------------------|
|                                                                                            |                     | Not readmitted<br>n=619             | Readmitted<br>n=151 | Total<br>n=770                    |
| Health-related factors                                                                     |                     | Absolute no. (horizontal frequency) |                     | Absolute no. (vertical frequency) |
| Main diagnosis related to atypical symptoms                                                | No                  | 463 (79)                            | 123 (21)            | 586 (76)                          |
|                                                                                            | Yes                 | 156 (85)                            | 28 (15)             | 184 (24)                          |
| Main diagnosis related to the respiratory system                                           | No                  | 546 (81)                            | 125 (19)            | 671 (87)                          |
|                                                                                            | Yes                 | 73 (74)                             | 26 (26)             | 99 (13)                           |
| Main diagnosis related to the circulatory system                                           | No                  | 432 (80)                            | 109 (20)            | 541 (70)                          |
|                                                                                            | Yes                 | 187 (82)                            | 42 (18)             | 229 (30)                          |
| Charlson Comorbidity Index score<br>(median=2; range, 0-12)                                | 0-1                 | 256 (86)                            | 43 (14)             | 308 (40)                          |
|                                                                                            | 2-3                 | 215 (79)                            | 56 (21)             | 271 (35)                          |
|                                                                                            | 4+                  | 139 (73)                            | 52 (27)             | 191 (25)                          |
| Polypharmacy (5 drugs or more)                                                             | No                  | 192 (86)                            | 32 (14)             | 224 (29)                          |
|                                                                                            | Yes                 | 427 (78)                            | 199 (22)            | 546 (71)                          |
| Previous hospitalization within 3-month period                                             | No                  | 464 (82)                            | 102 (18)            | 566 (74)                          |
|                                                                                            | Yes                 | 155 (76)                            | 49 (24)             | 204 (27)                          |
| Length of hospital stay<br>(median=5 (range 0-145) days)                                   | Five days or less   | 341 (83)                            | 68 (17)             | 409 (53)                          |
|                                                                                            | more than five days | 278 (77)                            | 83 (23)             | 361 (47)                          |
| Clinical assessment of cognitive problems (not dementia)                                   | No                  | 583 (81)                            | 137 (19)            | 720 (94)                          |
|                                                                                            | Yes                 | 36 (72)                             | 14 (28)             | 50 (6)                            |
| Clinical assessment of loss in ADL                                                         | No                  | 508 (81)                            | 123 (20)            | 631 (82)                          |
|                                                                                            | Yes                 | 111 (80)                            | 28 (20)             | 139 (18)                          |
| Thyroid disease                                                                            | No                  | 580 (81)                            | 136 (19)            | 716 (93)                          |
|                                                                                            | Yes                 | 39 (72)                             | 15 (28)             | 54 (7)                            |
| Rheumatologic condition                                                                    | No                  | 514 (81)                            | 122 (19)            | 636 (83)                          |
|                                                                                            | Yes                 | 105 (78)                            | 29 (22)             | 134 (17)                          |
| Respiratory disease                                                                        | No                  | 478 (82)                            | 104 (18)            | 582 (76)                          |
|                                                                                            | Yes                 | 141 (75)                            | 47 (25)             | 188 (24)                          |
| Psychological disorder (sleep disorder, depression)                                        | No                  | 410 (83)                            | 84 (17)             | 494 (64)                          |
|                                                                                            | Yes                 | 209 (76)                            | 67 (24)             | 276 (36)                          |
| Pain                                                                                       | No                  | 355 (83)                            | 72 (17)             | 427 (61)                          |
|                                                                                            | Yes                 | 264 (77)                            | 79 (23)             | 343 (39)                          |
| Gout disease                                                                               | No                  | 577 (81)                            | 140 (20)            | 717 (93)                          |
|                                                                                            | Yes                 | 42 (79)                             | 11 (21)             | 53 (7)                            |
| Glaucoma                                                                                   | No                  | 596 (81)                            | 140 (19)            | 736 (96)                          |
|                                                                                            | Yes                 | 23 (68)                             | 11 (32)             | 34 (4)                            |
| Acid disorder                                                                              | No                  | 432 (84)                            | 80 (16)             | 512 (65)                          |
|                                                                                            | Yes                 | 187 (73)                            | 71 (28)             | 258 (35)                          |
| Bone diseases                                                                              | No                  | 567 (80)                            | 138 (20)            | 705 (92)                          |
|                                                                                            | Yes                 | 52 (80)                             | 13 (20)             | 65 (8)                            |
| Epilepsy                                                                                   | No                  | 562 (81)                            | 135 (19)            | 697 (91)                          |
|                                                                                            | Yes                 | 57 (78)                             | 16 (22)             | 73 (9)                            |
| Diabetes                                                                                   | No                  | 517 (81)                            | 122 (19)            | 639 (83)                          |
|                                                                                            | Yes                 | 102 (78)                            | 29 (22)             | 131 (17)                          |
| Cardiovascular disease                                                                     | No                  | 130 (84)                            | 25 (16)             | 155 (20)                          |
|                                                                                            | Yes                 | 489 (80)                            | 126 (21)            | 615 (80)                          |

NOTE: The following covariates are not presented because of insufficient number of observations (<10 readmissions within 30 days): (1) Dementia (both from clinical assessment and register-based information), (2) cancer, (3) intestinal disease, (4) anemia, (5) migraine, (6) psychosis, (7) tuberculosis, (8) HIV, Parkinson (5) and (9) hyperlipidemia.

### Online table 3

| Population characteristics for A) all patients discharged from 16 February 2012 to 14 September 2012 from Department of Medicine, Holbæk University Hospital, B) patients for whom screening data were incomplete, and C) the patients who were screened and included in this study. |                      |                                      |                                                             |                                           |
|--------------------------------------------------------------------------------------------------------------------------------------------------------------------------------------------------------------------------------------------------------------------------------------|----------------------|--------------------------------------|-------------------------------------------------------------|-------------------------------------------|
|                                                                                                                                                                                                                                                                                      |                      | A) All patients discharged (n=2,026) | B) Patients for whom screening data were incomplete (n=366) | C) Patients screened and included (n=770) |
|                                                                                                                                                                                                                                                                                      |                      | Absolute no. (column percentages)    |                                                             |                                           |
| Age                                                                                                                                                                                                                                                                                  | Median (min-max)     | 77 (65-102)                          | 76 (65-102)                                                 | 78 (65-98)                                |
|                                                                                                                                                                                                                                                                                      | 77 years or less     | 1046 (52)                            | 195 (53)                                                    | 377 (49)                                  |
|                                                                                                                                                                                                                                                                                      | 78 years or more     | 980 (48)                             | 171 (47)                                                    | 393 (51)                                  |
| Gender                                                                                                                                                                                                                                                                               | Female               | 1016 (50)                            | 189 (52)                                                    | 368 (48)                                  |
|                                                                                                                                                                                                                                                                                      | Male                 | 1010 (50)                            | 177 (48)                                                    | 402 (52)                                  |
| Municipality                                                                                                                                                                                                                                                                         | Holbæk               | 875 (43)                             | 180 (49)                                                    | 311 (40)                                  |
|                                                                                                                                                                                                                                                                                      | Kalundborg           | 558 (29)                             | 81 (22)                                                     | 218 (28)                                  |
|                                                                                                                                                                                                                                                                                      | Odsherred            | 593 (28)                             | 105 (29)                                                    | 241 (31)                                  |
| Educational level                                                                                                                                                                                                                                                                    | Primary school       | 1018 (50)                            | 118 (51)                                                    | 434 (50)                                  |
|                                                                                                                                                                                                                                                                                      | Vocational education | 616 (30)                             | 95 (26)                                                     | 235 (31)                                  |
|                                                                                                                                                                                                                                                                                      | Higher education     | 255 (13)                             | 52 (14)                                                     | 101 (13)                                  |
|                                                                                                                                                                                                                                                                                      | Missing              | 137 (7)                              | 31 (9)                                                      | 50 (7)                                    |

### Online Figure 1: Receiver Operating Curve (ROC).

Online figure 1

Online Figure 2: Calibration diagram with four groups

Online figure 2

Online figure 3: Calibration diagram with ten groups

Online figure 3
